# Supplementary material for: The impact of vaccination on incidence and outcomes of SARS-CoV-2 infection in patients with kidney failure in Scotland
Source: bioRxiv or medRxiv preprint supplement (doi:10.1101/2022.01.05.22268785), 2022-01-06
Supplement: Supplementary file [file media-1.pdf]

### Supplemental Material

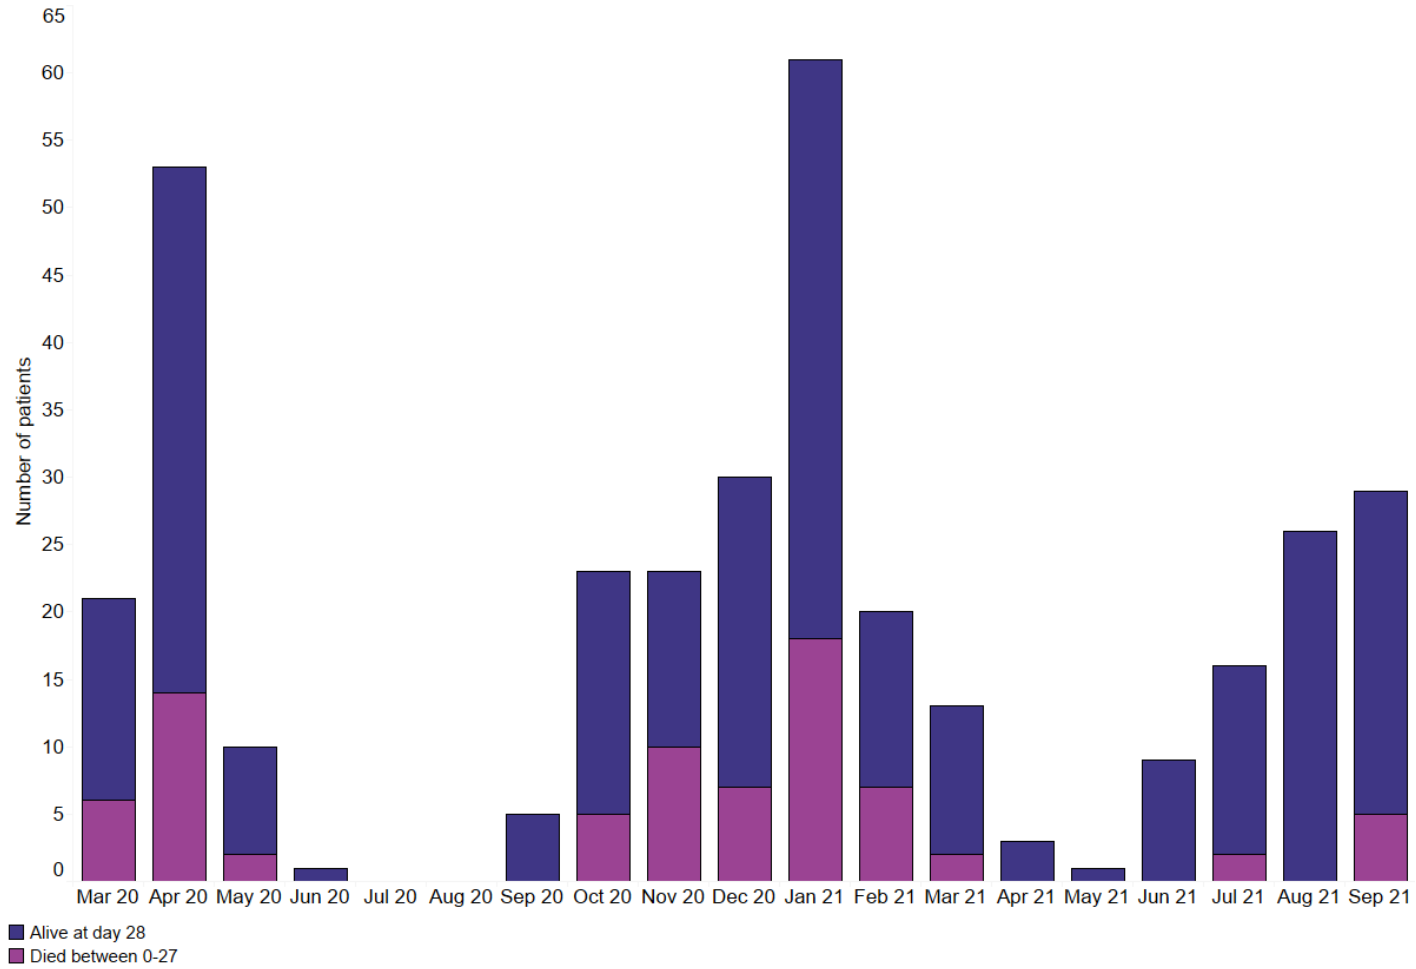

Figure S1a Monthly number of positive SARS-CoV-2 patients on dialysis in Scotland split by status at day 28 (alive in dark blue/dead in purple)

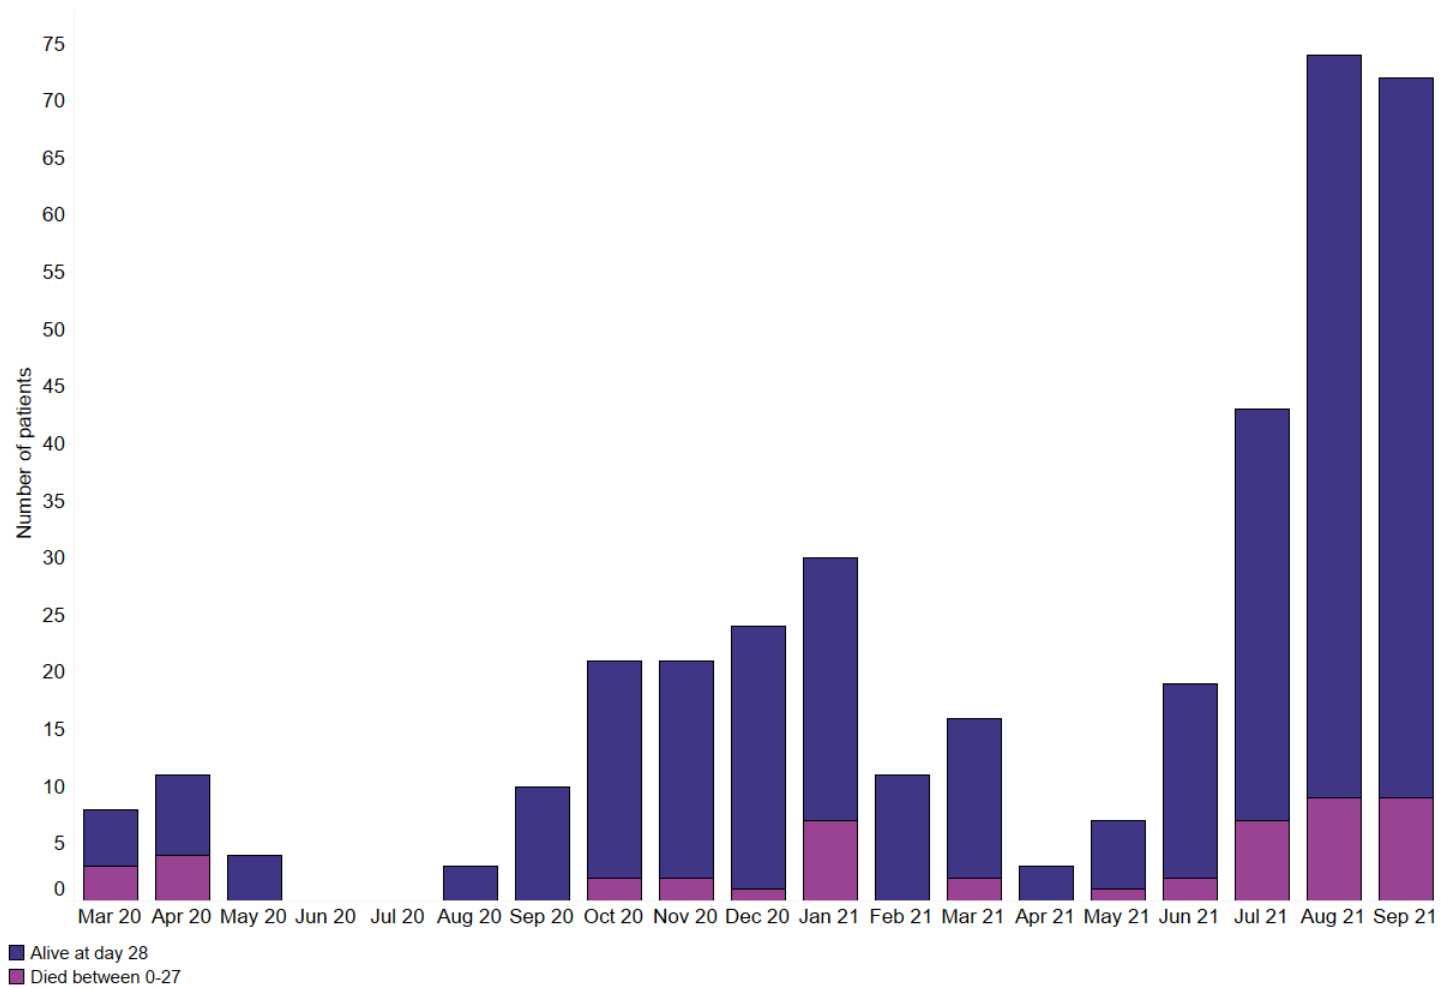

**Figure S1b:** Monthly number of positive SARS-CoV-2 patients with a kidney transplant in Scotland split by status at day 28 (alive in dark blue/dead in purple)

**Table S1: Vaccine Effectiveness for testing positive for COVID -19 (COVID-19 Tests Results from 01 Jan 21 – 19 October 21); Adult KRT Population as of 19 September 2021**

|                                    | <b>Positive SARS-CoV-2</b> |           |                  |
|------------------------------------|----------------------------|-----------|------------------|
|                                    | <b>Yes</b>                 | <b>No</b> | <b>All Cases</b> |
| Vaccinated                         | 357                        | 4654      | 5011             |
| Non-Vaccinated                     | 25                         | 210       | 235              |
| All                                | 382                        | 4864      | 5246             |
|                                    | <b>Risk of SARS-CoV-2</b>  |           |                  |
| Vaccinated                         |                            | 0.07      |                  |
| Non-Vaccinated                     |                            | 0.11      |                  |
| Risk of COVID-19 in Vaccinated     |                            | 7%        |                  |
| Risk of COVID-19 in Non-Vaccinated |                            | 11%       |                  |
| Risk Ratio                         |                            | 0.67      |                  |
| Vaccine Effectiveness              | 33% 95% CI (0-52)          |           |                  |

**Table S2: Vaccine Effectiveness for Hospitalization within 14 days of positive test COVID-19 Tests Results from 01 Mar 21 - 05 October 21**

|                                           | <b>Hospitalisation</b>         |           |                           |
|-------------------------------------------|--------------------------------|-----------|---------------------------|
|                                           | <b>Yes</b>                     | <b>No</b> | <b>All Positive Cases</b> |
| Vaccinated                                | 110                            | 216       | 326                       |
| Non-Vaccinated                            | 12                             | 10        | 22                        |
| All                                       | 122                            | 226       | 348                       |
|                                           | <b>Risk of Hospitalisation</b> |           |                           |
| Vaccinated                                | 0.34                           |           |                           |
| Non-Vaccinated                            | 0.55                           |           |                           |
| Risk of Hospitalisation in Vaccinated     | 34%                            |           |                           |
| Risk of Hospitalisation in Non-Vaccinated | 55%                            |           |                           |
| Risk Ratio                                | 0.62                           |           |                           |
| Vaccine Effectiveness                     | 38% (95% CI 0- 57)             |           |                           |

**Table S3: Vaccine Effectiveness (Transplant patients only) for testing positive for COVID -19 (COVID-19 Tests Results from 01 Jan 21 – 19 October 21); Adult KRT Population as of 19 September 2021**

|                                           | <b>Positive SARS-CoV-2</b> |           |              |
|-------------------------------------------|----------------------------|-----------|--------------|
|                                           | <b>Yes</b>                 | <b>No</b> | <b>Total</b> |
| Vaccinated                                | 259                        | 2860      | 3119         |
| Non-Vaccinated                            | 22                         | 139       | 161          |
| All                                       | 281                        | 2999      | 3280         |
|                                           | <b>Risk of Infection</b>   |           |              |
| Vaccinated                                | 0.08                       |           |              |
| Non-Vaccinated                            | 0.14                       |           |              |
| Risk of Hospitalisation in Vaccinated     | 8%                         |           |              |
| Risk of Hospitalisation in Non-Vaccinated | 14%                        |           |              |
| Risk Ratio                                | 0.61                       |           |              |
| Vaccine Effectiveness                     | 39%                        |           |              |

**Table S4: Vaccine Effectiveness (Transplant patients only) for hospitalization within 14 days of positive test COVID-19 Tests Results from 01 Mar 21 - 05 October 21**

|                                           | <b>Hospitalisation</b>         |           |              |
|-------------------------------------------|--------------------------------|-----------|--------------|
|                                           | <b>Yes</b>                     | <b>No</b> | <b>Total</b> |
| Vaccinated                                | 81                             | 154       | 235          |
| Non-Vaccinated                            | 11                             | 8         | 19           |
| All                                       | 92                             | 162       | 254          |
|                                           | <b>Risk of Hospitalisation</b> |           |              |
| Vaccinated                                | 0.34                           |           |              |
| Non-Vaccinated                            | 0.58                           |           |              |
| Risk of Hospitalisation in Vaccinated     | 34%                            |           |              |
| Risk of Hospitalisation in Non-Vaccinated | 58%                            |           |              |
| Risk Ratio                                | 0.60                           |           |              |
| Vaccine Effectiveness                     | 40%                            |           |              |

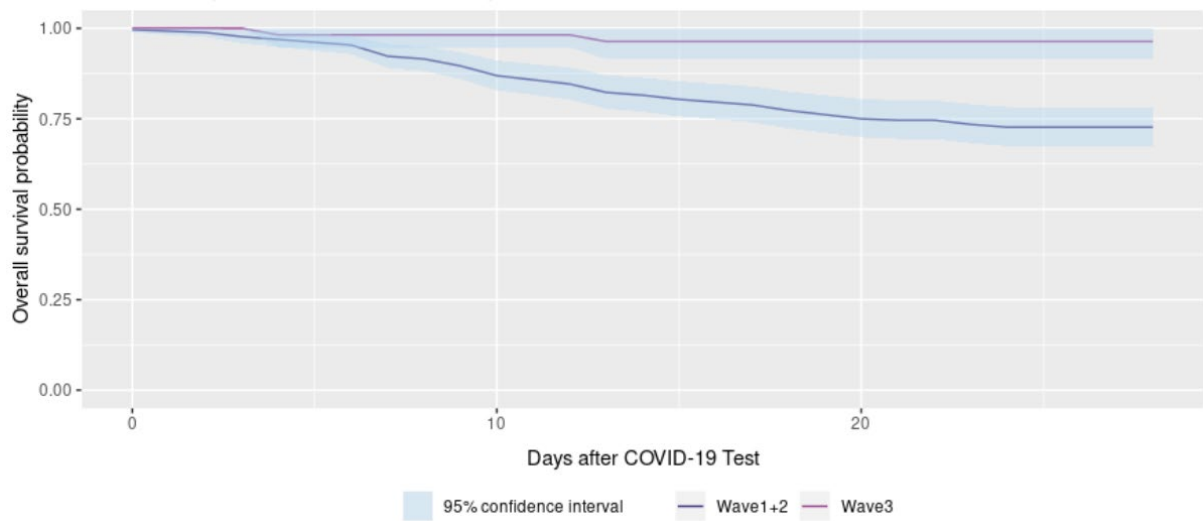

**Figure S2a:** Kaplan-Meier curve of 28-day survival following a positive SARS-CoV-2 PCR test in patients on dialysis in Scotland split by wave.

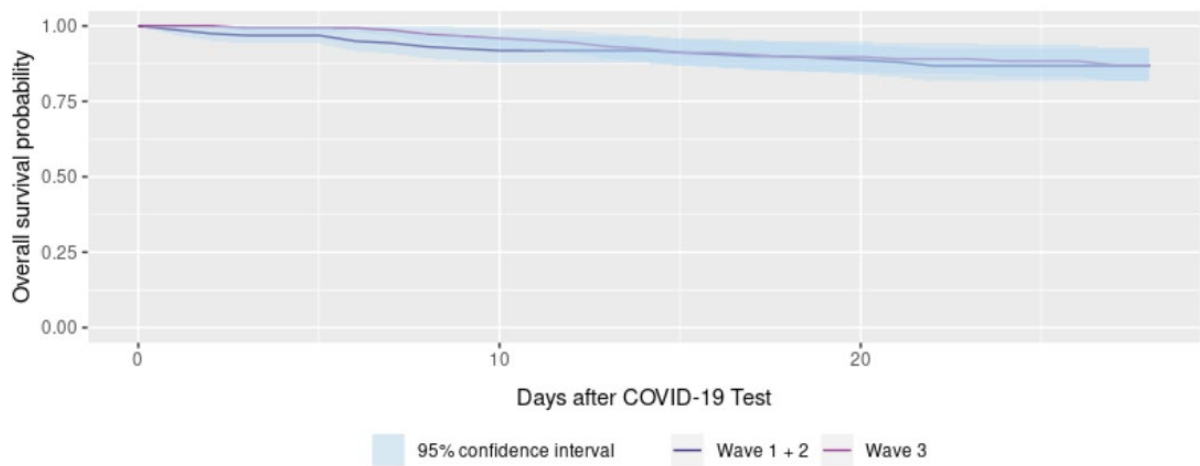

**Figure S2b:** Kaplan-Meier curve of 28-day survival following a positive SARS-CoV-2 PCR test in patients with a functioning kidney transplant in Scotland, split by wave.

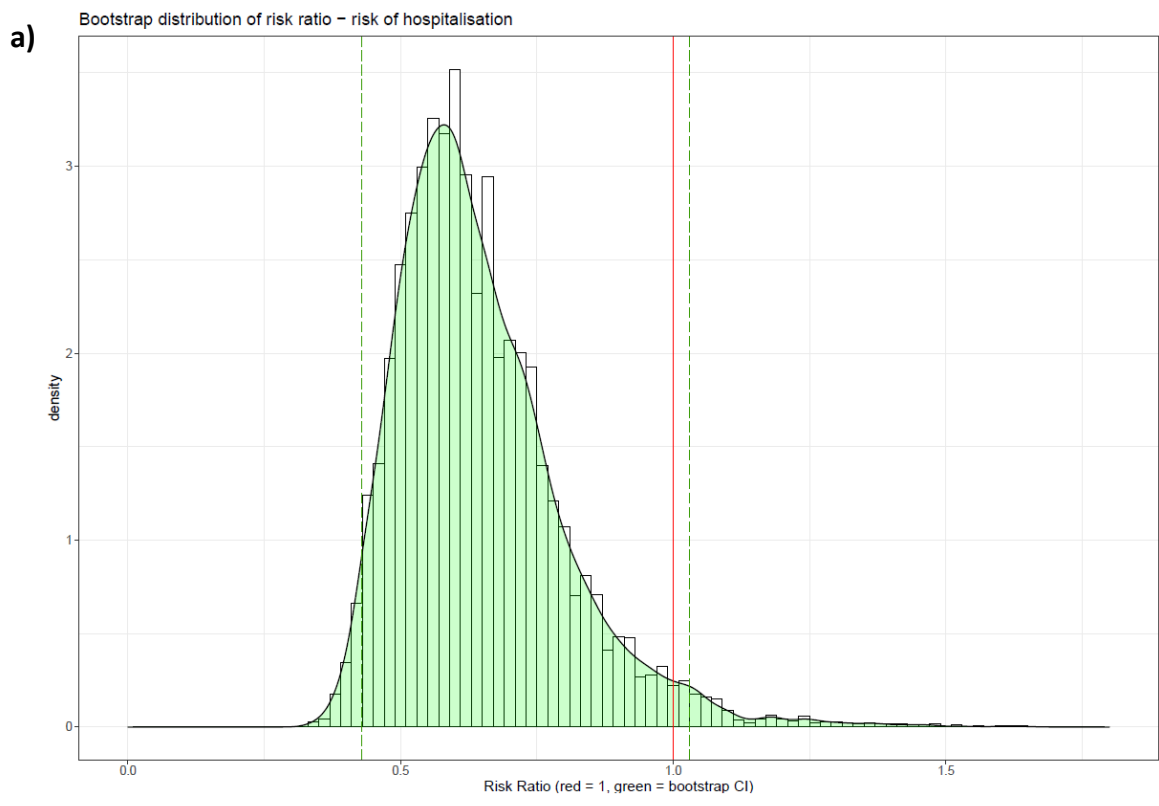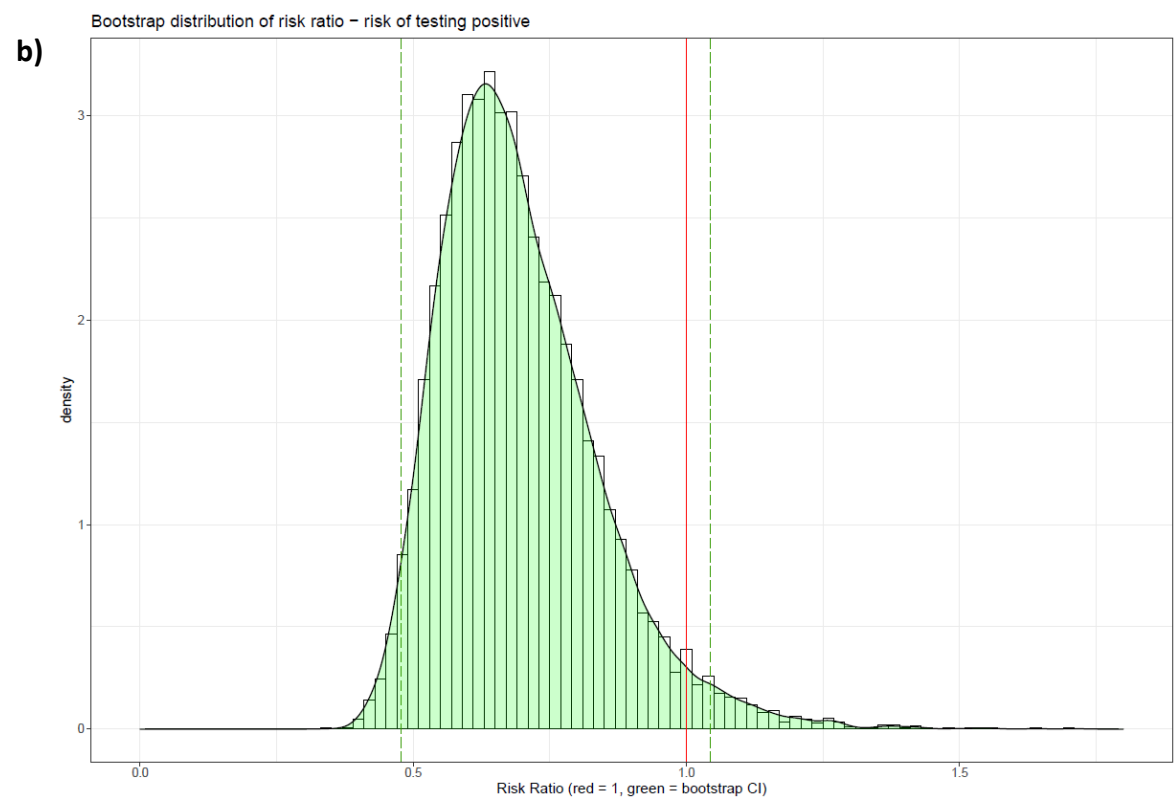

**Figures S3a and b:** Bootstrap distribution with 95% confidence interval for relative risk of hospitalization (a) and testing positive (b) in vaccinated versus unvaccinated individuals.
